# Supplementary material for: Facile Synthesis of Molecularly Imprinted Ratiometric Fluorescence Sensor for Ciguatoxin P-CTX-3C Detection in Fish
Source: MDPI journal article supplement (doi:10.3390/foods11203239), 2022-10-17
Supplement: s1 [file s1]

## **Supporting information**

# **Facile Synthesis of Molecularly Imprinted Ratiometric Fluorescence Sensor for Ciguatoxin P-CTX-3C Detection in Fish**

**Zhenke Qi, Cheng Xiang, Xingguo Tian and Xiaoyan Xu\***

Guangdong Provincial Key Laboratory of Food Quality and Safety, College of Food Science, South China  
Agricultural University, Guangzhou 510642, China

\* Correspondence: yanzixu\_2001@scau.edu.cn; Tel.: +86-020-85283448

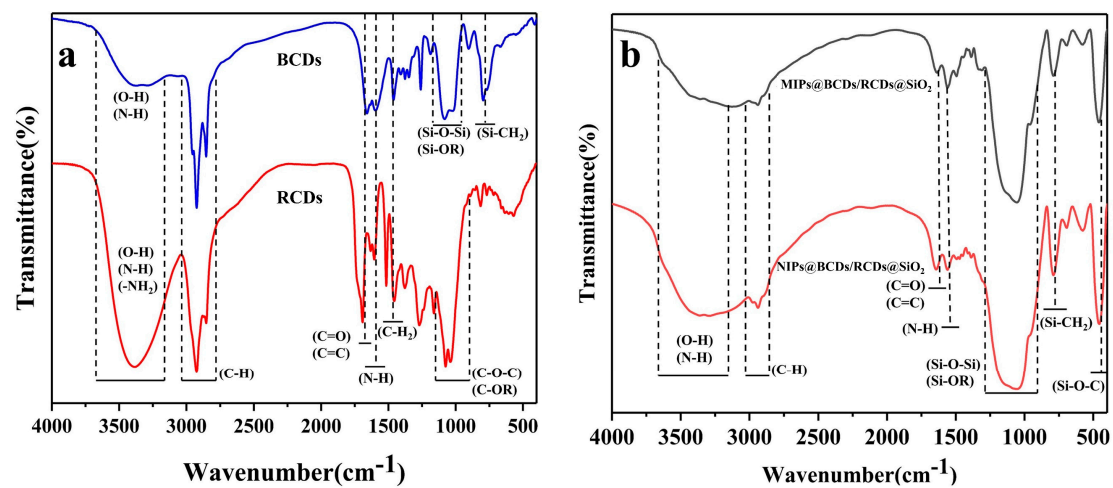

**Figure S1.** FT-IR diagram of RCDs, BCDs(a) and MIPs@BCDs/RCDs@SiO<sub>2</sub>,  
NIPs@BCDs/RCDs@SiO<sub>2</sub>(b)

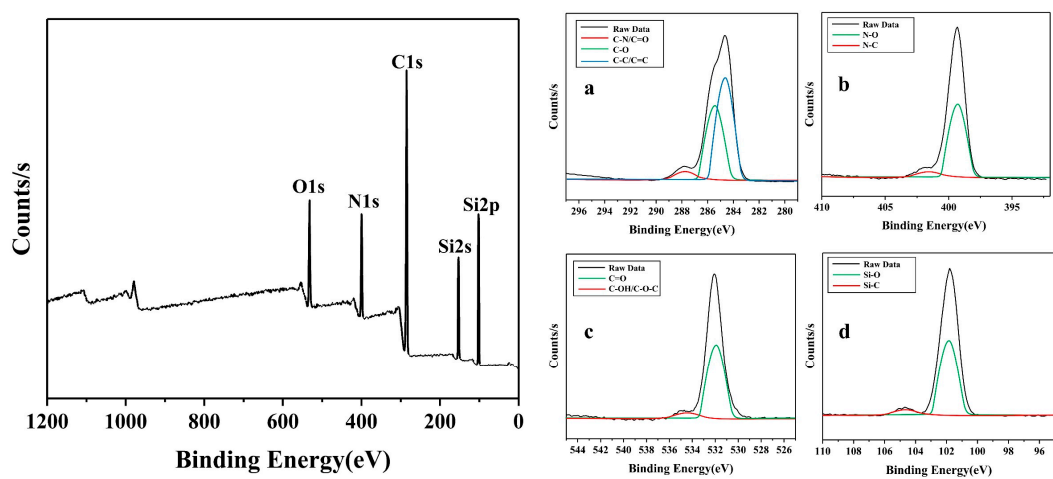

**Figure S2.** XPS spectra of MIP@BCDs/RCDs@SiO<sub>2</sub> and C1s(a), N1s(b), O1s(c) and Si2p(d)

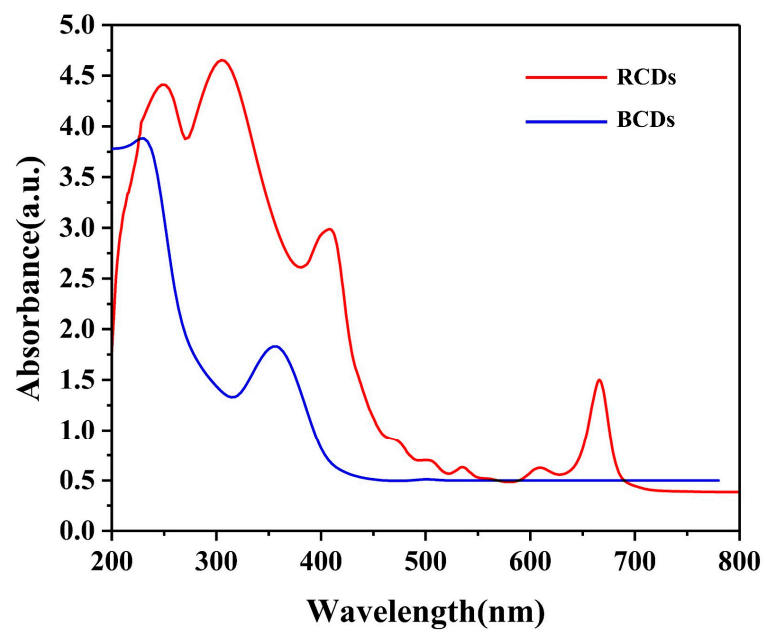

**Figure S3.** Uv-vis diagram of RCDs and BCDs

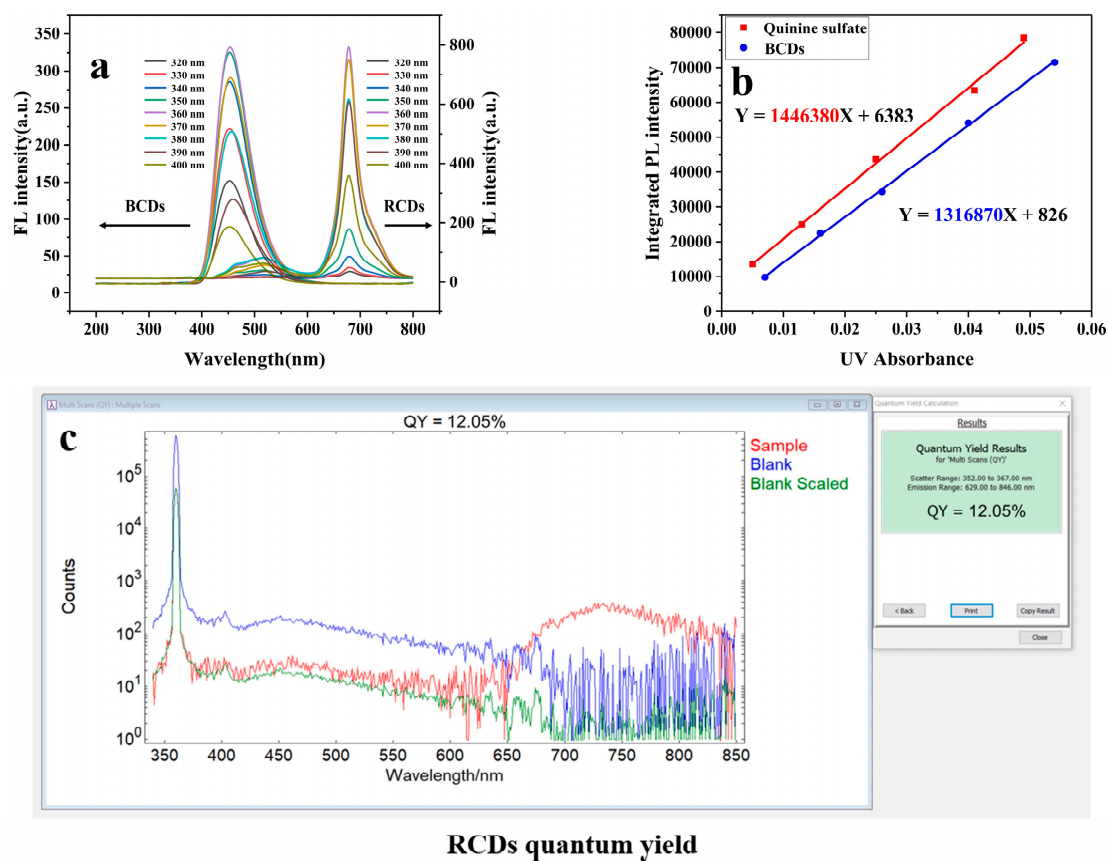

**Figure S4.** Fluorescence spectra of RCDs and BCDs(a), linear curve comparison of BCDs and quinine sulfate(b), quantum yield of RCDs(c)

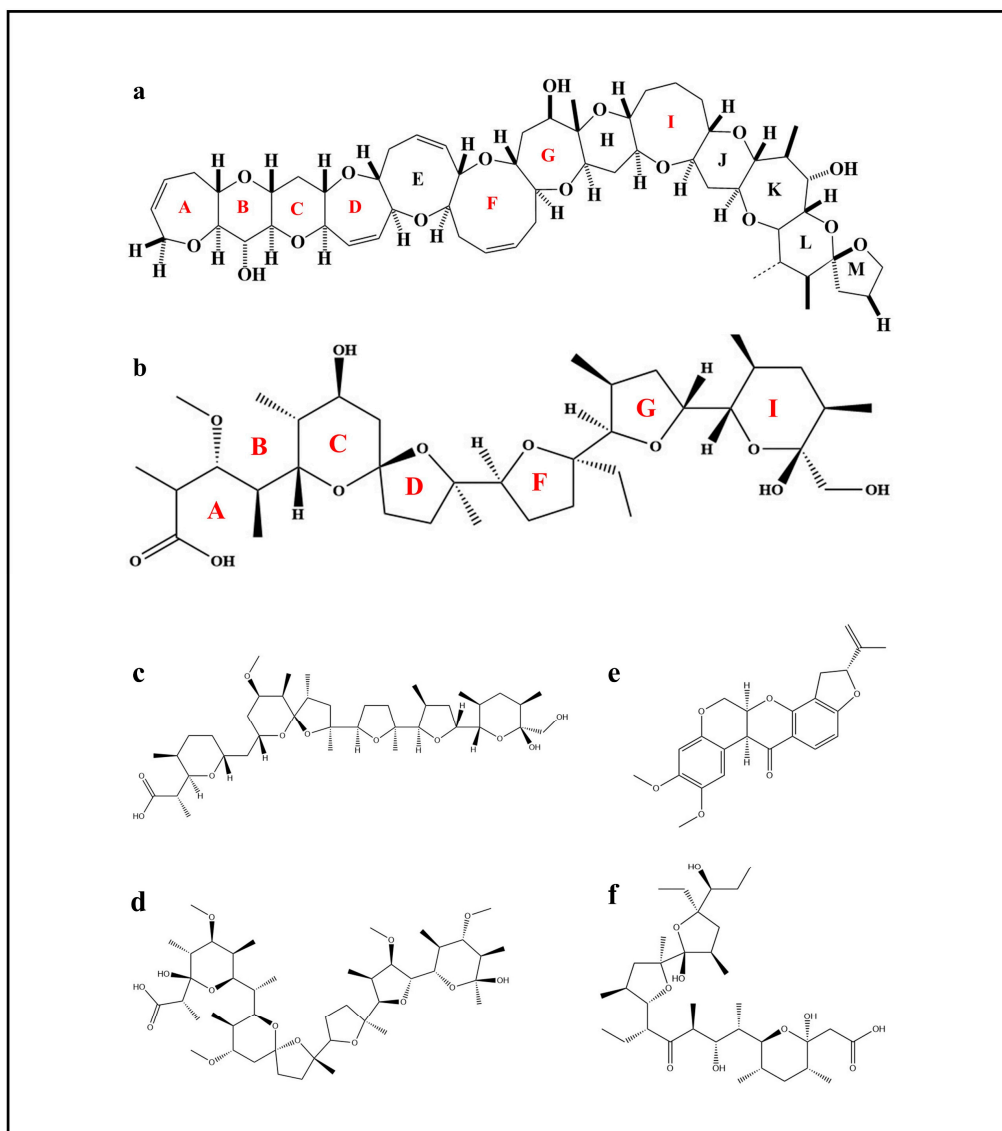

**Figure S5.** Molecular formulas of P-CTX-3C(a), monensin(b), nigericin(c), rotenone(d), ionomycin A(e) and lysozyme(f)

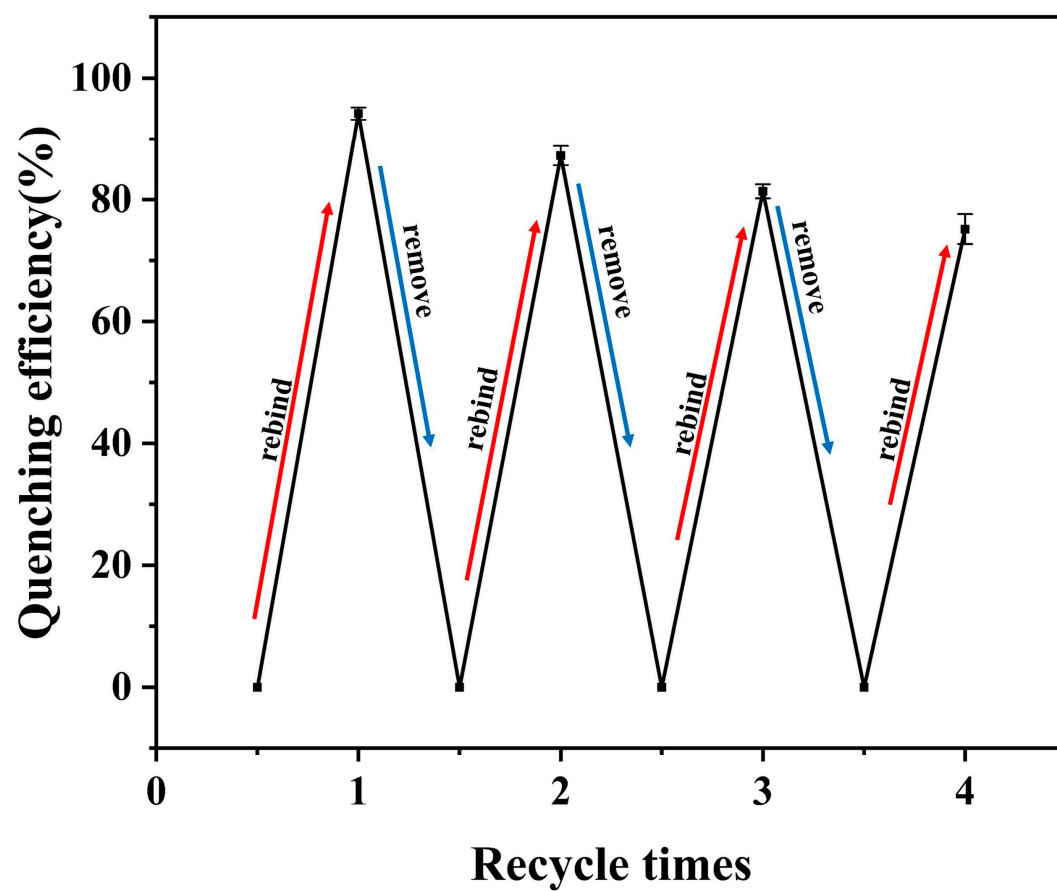

**Figure S6.** Four cycles of absorption and desorption of P-CTX-3C
